# Supplementary material
Source: Springer Nature journal article supplement (https://www.springermedizin.de/resource/supplementary/12873_2009_102_MOESM1_ESM.pdf/9431454)

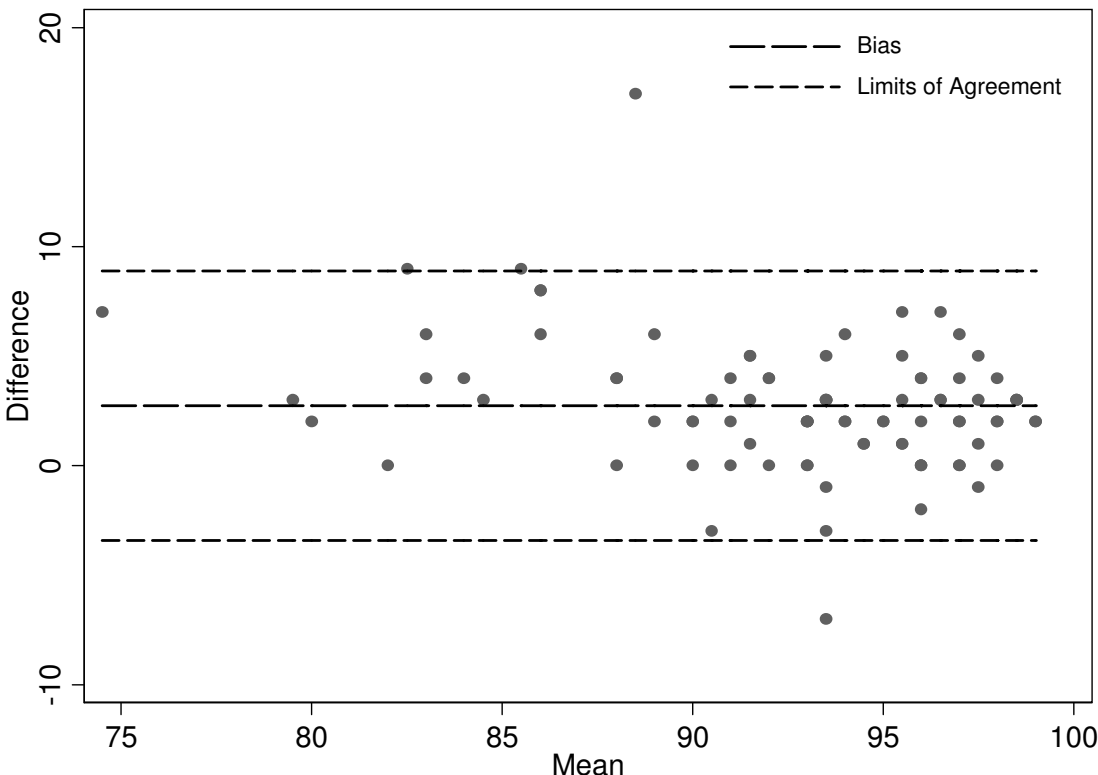

Supplement: MOESM1 [file 9431454]
